# Supplementary material for: Experiences with neonatal jaundice management in hospitals and the community: interviews with Australian health professionals
Source: HighWire-hosted journal article supplement (doi:10.1136/bmjopen-2023-075896), 2024-02-01
Supplement: bmjopen-2023-075896supp001_data_supplement.pdf [file bmjopen-2023-075896supp001_data_supplement.pdf]

**Supplementary File: Interview/Discussion Guide****Theme List**

- a) general experience
- b) how neonatal jaundice is managed
- c) educational preparation
- d) policy and guidelines
- e) research and ongoing professional development, and
- f) identified gaps.

**Prompts**

Questions were modified depending on relevance to the participant health professional category.

1. How long have you working as a (type will be specified)? Can you tell me a bit about yourself and what your work involves?
2. What has your general experience been in relation to neonatal jaundice – its recognition, assessment and management?
3. Do you think neonatal jaundice is well managed?
4. Does your organisation have a surveillance strategy for neonatal jaundice?
5. Approximately how many cases of newborn jaundice have you observed? Approximately how many of these required testing?
6. How is jaundice assessed? Can you outline the steps?
7. To what extent have you relied on visual estimation of jaundice?
8. When is a bilirubin test ordered?
9. How is bilirubin tested where you work? What technologies and processes are involved?
10. How do you interpret bilirubin levels? Above what level is treatment considered?
11. What is the highest level of bilirubin you have observed?
12. Have there ever been problems with the testing equipment? If so, can you recall what these problems entailed?
13. Are you aware of any jaundice management guidelines? What do you think about these guidelines? Do you use them? How are these guidelines developed and reviewed?
14. What training is provided to you, and by whom, in relation to neonatal jaundice?

15. Are you happy with the level of training and ongoing professional development offered to you in relation to neonatal jaundice?

16. How do you keep up to date in terms of the local, national and international literature relating to the management of neonatal jaundice?

17. Do you have any idea of the percentage of neonates readmitted for treatment of jaundice?

18. How confident are you about the risk factors for severe neonatal jaundice? Can you tell me what they are?

19. Do you know what the potential outcomes are if neonatal jaundice is unmonitored or untreated?

20. Over the last ten years or so, how have you adjusted your practices in relation to the management of neonatal jaundice? Consider technology advancements, early discharge policies, etc.

21. From your experience, are there any obstacles in the effective management of neonatal jaundice?
